# Supplementary material for: The understanding of research ethics at health sciences schools in Jordan: a cross-sectional study
Source: PubMed Central journal article supplement (PMC7175529; doi:10.1186/s12909-020-02040-5), 2020-04-21
Supplement: 12909_2020_2040_MOESM1_ESM.pdf [file 12909_2020_2040_MOESM1_ESM.pdf]

## Appendix A

| <b>Demographic and research experience</b>                                                   |                                                                       |                                           |                                                                  |                      |
|----------------------------------------------------------------------------------------------|-----------------------------------------------------------------------|-------------------------------------------|------------------------------------------------------------------|----------------------|
| 1. Age                                                                                       |                                                                       | 2. Gender                                 | M                                                                | F                    |
| 3. Rank                                                                                      | Lecturer                                                              | Assistant Prof.                           | Associate Prof.                                                  | Full prof.           |
| 4. Faculty                                                                                   | Medicine                                                              | Dentistry                                 | Pharmacy                                                         | Nursing              |
| 5. Projects performed involves<br><i>(check all that apply)</i>                              | Surveys                                                               | Cells                                     | Animals                                                          | Human (experimental) |
| <b>Knowledge, Attitude and Practice (KAP) of research ethics</b>                             |                                                                       |                                           |                                                                  |                      |
| 1. Research ethics is important                                                              | <input checked="" type="checkbox"/> Strongly agree                    | <input checked="" type="checkbox"/> Agree | Disagree                                                         | Strongly disagree    |
| 2. If agree, why do you think research ethics is important?<br><i>(check all that apply)</i> | <input checked="" type="checkbox"/> Promoting research best practices |                                           | <input checked="" type="checkbox"/> Create open communication    |                      |
|                                                                                              | Securing personal finances                                            |                                           | <input checked="" type="checkbox"/> Gaining public trust         |                      |
|                                                                                              | Maximizing publication quantity                                       |                                           | <input checked="" type="checkbox"/> Gaining governmental trust   |                      |
|                                                                                              | <input checked="" type="checkbox"/> Protecting participants           |                                           | <input checked="" type="checkbox"/> Gaining private sector trust |                      |
|                                                                                              | <input checked="" type="checkbox"/> Sharing ideas                     |                                           | <input checked="" type="checkbox"/> Promoting morality           |                      |
| 3. Is research irrelevant to ethics and morality?                                            | Yes                                                                   |                                           | <input checked="" type="checkbox"/> No                           |                      |
| 4. Have you been exposed to formal research ethics training (course, workshop, etc.)?        | Yes                                                                   |                                           | No                                                               |                      |
| 5. Are you familiar with the basic major ethical principles of research?                     | Yes                                                                   |                                           | No                                                               |                      |

## Appendix A

|                                                                                                           |                                                                                                           |                                 |                                                                                                      |                              |
|-----------------------------------------------------------------------------------------------------------|-----------------------------------------------------------------------------------------------------------|---------------------------------|------------------------------------------------------------------------------------------------------|------------------------------|
| 6. The following is a major research ethical principle<br>(check all that apply)                          | ✓ Autonomy: (freedom of participants to decide what to do)                                                |                                 | ✓ Justice: (the fair selection of research participants)                                             |                              |
|                                                                                                           | Conflict of interest: (deciding when to participate or not in research projects when you have a conflict) |                                 | Collaboration: (deciding how research team relations should be)                                      |                              |
|                                                                                                           | Authorship: (deciding who deserves authorship and who does not)                                           |                                 | ✓ Non-maleficence: (non-harming or inflicting the least harm possible to reach a beneficial outcome) |                              |
| 7. Which of the following terms are you familiar with in research?<br>(check all that apply)              | Plagiarism                                                                                                | Fabrication                     | Falsification                                                                                        | Ghost authorship             |
|                                                                                                           | Gift authorship                                                                                           | Conflict of interest            | Dual publication                                                                                     | Salami publication           |
| 8. Which of the following terms do you think has guidelines in research ethics?<br>(check all that apply) | ✓ Proposal preparation                                                                                    | ✓ Investigator responsibilities | Financial satisfaction                                                                               | ✓ Data collection            |
|                                                                                                           | ✓ Research misconduct                                                                                     | ✓ Data publication              | ✓ Non-publication of data                                                                            | ✓ Data storage and retention |
|                                                                                                           | ✓ Authorship                                                                                              | ✓ Conflict of interest          | ✓ Conflict of commitment                                                                             | ✓ Collaboration              |
|                                                                                                           | ✓ Sharing data                                                                                            | ✓ Data ownership                | ✓ Peer review                                                                                        | Job security                 |
| 9. For how long do you keep all your projects' documents?                                                 | < 1 year                                                                                                  | 1-3 years                       | ✓ 3-5 Years                                                                                          | ✓ > 5 years                  |
| 10. From your perspective, who owns the data of a project (you can choose more than one answer)?          | The student                                                                                               | The PI ± collaborators          | The school or university                                                                             | Granting agency              |
| 11. What do you think is the role of a research ethics committee?<br>(check all that apply)               | ✓ To review ethical aspects of research                                                                   |                                 | ✓ To review the scientific design of research                                                        |                              |
|                                                                                                           | ✓ To determine if informed consent is needed in research of human subjects                                |                                 | ✓ To protect the welfare and rights of research participants                                         |                              |
|                                                                                                           | To ensure financial security of researcher                                                                |                                 | To ascertain number of publications that should come out of the project                              |                              |

## Appendix A

|                                                                                                                                |                                                    |                                                                     |                                                    |                                                                                                                |
|--------------------------------------------------------------------------------------------------------------------------------|----------------------------------------------------|---------------------------------------------------------------------|----------------------------------------------------|----------------------------------------------------------------------------------------------------------------|
| 12. Who of the following persons do you think is justified to be a member of an REC?<br><i>(check all that apply)</i>          | <input checked="" type="checkbox"/> Physician      | <input checked="" type="checkbox"/> Nurse                           | <input checked="" type="checkbox"/> Ethicist       | <input checked="" type="checkbox"/> Philosopher                                                                |
|                                                                                                                                | <input checked="" type="checkbox"/> Lawyer         | <input checked="" type="checkbox"/> Any regular person (lay person) |                                                    | Government official                                                                                            |
| 13. Which of the following(s) is (are) considered guidelines in research ethics?<br><i>(check all that apply)</i>              | <input checked="" type="checkbox"/> Nuremberg Code | <input checked="" type="checkbox"/> Declaration of Helsinki         | <input checked="" type="checkbox"/> Belmont Report | <input checked="" type="checkbox"/> Council of the International Organizations of the Medical Sciences (CIOMS) |
| 14. Which of the following activities accomplished by research personnel deserves authorship?<br><i>(check all that apply)</i> | Project design only                                | Data collection only                                                | Manuscript writing only                            | Statistical analyses only                                                                                      |
|                                                                                                                                | Data analysis only excluding statistical analyses  | Being the senior Investigator who brought the funding               |                                                    | <input checked="" type="checkbox"/> Project design & data analysis & manuscript writing                        |

## Appendix A

**Please, comment on the following statements:**

|                                                                                                                                                     |         |            |         |              |
|-----------------------------------------------------------------------------------------------------------------------------------------------------|---------|------------|---------|--------------|
| 1. All research ethics guidelines apply to all societies and cultures                                                                               | Agree   | ✓ Disagree | Neutral | I don't know |
| 2. Research ethics should be mandatory in postgraduate programs                                                                                     | ✓ Agree | Disagree   | Neutral | I don't know |
| 3. All investigators of human and animal studies should have training in research ethics                                                            | ✓ Agree | Disagree   | Neutral | I don't know |
| 4. Not all participants comprehend research projects well. Accordingly, there is no need to provide them with details                               | Agree   | ✓ Disagree | Neutral | I don't know |
| 5. There is no need to obtain informed consent to do research on blood samples already withdrawn for clinical tests                                 | Agree   | ✓ Disagree | Neutral | I don't know |
| 6. There should be a research ethics committee (REC) at each university                                                                             | ✓ Agree | Disagree   | Neutral | I don't know |
| 7. Only human subject research must be reviewed by an REC                                                                                           | Agree   | ✓ Disagree | Neutral | I don't know |
| 8. Review by an REC would delay research projects and make it harder for the researcher to perform it                                               | Agree   | ✓ Disagree | Neutral | I don't know |
| 9. If there is a scientific committee for reviewing research, there is no need for an REC                                                           | Agree   | ✓ Disagree | Neutral | I don't know |
| 10. Members of REC should be at least professors with high authority in the university                                                              | Agree   | ✓ Disagree | Neutral | I don't know |
| 11. There is no need for child approval in research if they are less than 15 years as long as parents are consenting                                | Agree   | ✓ Disagree | Neutral | I don't know |
| 12. Retrospective studies are exempt from informed consent                                                                                          | Agree   | ✓ Disagree | Neutral | I don't know |
| 13. The researcher (by him/herself) can decide that no informed consent is needed if the research is a retrospective study (data already collected) | Agree   | ✓ Disagree | Neutral | I don't know |
| 14. Informed consent should be always written                                                                                                       | Agree   | ✓ Disagree | Neutral | I don't know |
